# Supplementary material
Source: PubMed Central journal article supplement (PMC3856848)
Supplement: 1319648110_pnas.201319648SI.pdf [file 1319648110_pnas.201319648SI.pdf]

# Supporting Information

Rossig et al. 10.1073/pnas.1319648110

## SI Materials and Methods

**Athp20 and Athp30 Mutant Characterization and Analysis of the Athp30/30-2 RNAi Lines.** *Athp20;1* and *Athp20;2* (SALK\_020671 and SALK\_125640) as well as *Athp30;2* and *Athp30;3* (SALK\_112126 and SALK\_046194) mutant seeds were obtained from the Salk Institute Genomic Analysis Laboratory collection (1). Identification of homozygous mutant plants was performed by PCR-based techniques (2), using appropriate primer combinations (Table S3). For the construction of inverted repeats that give rise to double-stranded RNA and induce the directed degradation of mRNA, published protocols were used (3, 4). Adequate constructs with a hairpin-loop forming intron (PDK, pyruvate orthophosphate dikinase) between sense and antisense gene fragments were created with the help of the vector pHannibal (5). The gene fragments were synthesized by PCR (2) and appropriate primers (Table S3), with added restriction sites defining the final orientation (sense/antisense) after cloning.

1. Alonso JM, et al. (2003) Genome-wide insertional mutagenesis of *Arabidopsis thaliana*. *Science* 301(5633):653–657.
2. Innis MA, Gelfand DH, Sninsky JJ, White TJ (1990) *PCR Protocols* (Academic, San Diego, CA).
3. Ruiz-Ferrer V, Voinnet O (2009) Roles of plant small RNAs in biotic stress responses. *Annu Rev Plant Biol* 60:485–510.
4. Kovács-Bogdán E, Soll J, Bölter B (2010) Protein import into chloroplasts: The Tic complex and its regulation. *Biochim Biophys Acta* 1803(6):740–747.
5. Wesley SV, et al. (2001) Construct design for efficient, effective and high-throughput gene silencing in plants. *Plant J* 27(6):581–590.
6. Yin Y, Chory Y, Baulcombe D (2005) RNAi in transgenic plants. *Curr Protoc Mol Biol*, 10.1002/0471142727.mb2606s.

The generated construct was transferred into the binary vector pArt27 (6).

**Bioinformatics Tools.** Phylogenetic trees were constructed using the sequences outlined in Tables S1 and S2 and the Clustal-X/Treeview, as well as MUSCLE and TMbase programs (7–10).

**In Planta Localization of HP20 and HP30.** Transformation of *Athp20;1* and *Athp20;2* mutants with DNAs encoding chloroplast-envelope quinone-oxidoreductase homolog (ceQORH)-GFP fusion proteins was performed using appropriate GATEWAY clones (Table S3) and the floral dip method (11). Confocal laser scanning microscopy was carried out with a Leica TCS SP5 microscope with argon laser excitation at 488 nm (GFP) and 561 nm (RFP). GFP, RFP, and chlorophyll were detected at emission wavelengths of 510–525 nm, 575–605 nm, and 650–750 nm, respectively. Leica confocal software LAS AF and Adobe Photoshop 7 (Adobe Systems) were used for image acquisition and processing.

7. Jeanmougin F, Thompson JD, Gouy M, Higgins DG, Gibson TJ (1998) Multiple sequence alignment with Clustal X. *Trends Biochem Sci* 23(10):403–405.
8. Page RDM (1996) TreeView: An application to display phylogenetic trees on personal computers. *Comput Appl Biosci* 12(4):357–358.
9. Edgar RC (2004) MUSCLE: A multiple sequence alignment method with reduced time and space complexity. *BMC Bioinformatics* 5:113.
10. Hofmann K, Stoffel W (1993) TMbase – a database of membrane spanning protein segments. *Biol Chem Hoppe-Seyler* 374:166.
11. Clough SJ, Bent AF (1998) Floral dip: A simplified method for Agrobacterium-mediated transformation of *Arabidopsis thaliana*. *Plant J* 16(6):735–743.

**A. Peptides HP20**

Peptide 1: AANDSSNAIDIDGNLSDSNLNTDGDEATDNDSSKALVTIPAPAVCLFRFAGDAAGGAVM  
 Peptide 2: ALVTIPAPAVCLFRFAGDAAGGAVMGSIFGYGSGLF  
 Peptide 3: TALAHSVSLRHQTGLFQDHH  
 Peptide 4: HQTGLFQDHH

|      |     |                                                                         |
|------|-----|-------------------------------------------------------------------------|
| HP20 | 1   | <u>MAANDSSNAIDIDGNLSDSNLNTDGDEATDNDSSKALVTIPAPAVCLFRFAGDAAGGAV</u> 60   |
|      |     | MAA +SSNAI++D +LSDS N D ++ TD+DSS + IPAPAVCL RFAGDAA GA                 |
| HP22 | 1   | MAAENSSNAINVDTSLSDSKPNRDANDMTDHDSSKALVIPAPAVCLVRFAGDAASGAF 60           |
| HP20 | 61  | <u>MGSIFGYGSGLFKFKKGFKGSFADAGQSAKTFAVLSGVHSLVCLLKQIRGKDDAINVGVA</u> 120 |
|      |     | MGS+FGYGSGLFKFKKGFKGSF DAGQSAKTFAVLSGVHSLVCLLKQIRGKDDAINVGVA            |
| HP22 | 61  | MGSVFVGYGSGLFKFKKGFKGSFVADAGQSAKTFAVLSGVHSLVCLLKQIRGKDDAINVGVA 120      |
| HP20 | 121 | GCCTGLALSFPGAPQALQSCSLTFGAFSFILEGLNKRQTALAHSVSLRHQTGLFQDHHRA 180        |
|      |     | GCCTGLALSFPGAPQA+LQSCSLTFGAFSFILEGLNKRQTALAHSVS R QT +                  |
| HP22 | 121 | GCCTGLALSFPGAPQAMLQSCSLTFGAFSFILEGLNKRQTALAHSVSFRQQT--RSPQHD 177        |
| HP20 | 181 | LP-LSLALPIPEEIKGAFSSFCNSLAKPRKF 210                                     |
|      |     | LP LSLA+PI +EIKGAFSSFC SL KP+K                                          |
| HP22 | 178 | LPLLSLAIPIHDEIKGAFSSFCNSLTKPKKL 208                                     |

**B. Peptides HP30 and HP30-2**

**Peptides HP30**

Peptide 1: SSGEMMA MASLFNDQON PIQQFQVK  
 Peptide 2: EVETNFKTWLSK  
 Peptide 3: QSIPVEAAVVSTMSGVQGAFIGGLMGTLSPEMPQAGVDPQAIASMK

**Peptides HP30-2:**

|           |     |                                                                          |
|-----------|-----|--------------------------------------------------------------------------|
| Peptide 4 |     | LPVEAAVV TAMGGVQGAFIGGLMGTLSPEMPQAGIDPQAMASLK                            |
| Peptide 5 |     | EDLES AVVAAPFGSGVAYSLSVAGLQGPMPNAITTAAGFAVFQGVFFK                        |
| HP30      | 3   | VGGGEGDQKRSSGEMMAMASLFNDQONPIQQFQVKFKEVETNFKTWLSKQSIPEAAVV 62            |
|           |     | +G GEGD+KR E MA+ SL DQONPIQQFQVKFKE+ET FK+WLSKQ +PVEAAVV                 |
| 30-2      | 1   | MGKDGEKDKR---ETMAVMSLMKDQONPIQQFQVKFKEIETGFKSWLSKQKLPVEAAVV 57           |
| HP30      | 63  | <u>STMSGVQGAFIGGLMGTLSPEMPQAGVDPQAIASMKQAQALVGGPWPQARNFAAITGVNA</u> 122  |
|           |     | + M GVQGAFIGGLMGTLSPEMPQAG+DPQA+AS+KQ QALVGGP VQARNFAAITGVNA             |
| 30-2      | 58  | <u>TAMGGVQGAFIGGLMGTLSPEMPQAGIDPQAMASLKQTAQALVGGPLVQARNFAAITGVNA</u> 117 |
| HP30      | 123 | GIASVMKRIRGKEDIESAVVAALGSGFAYSLSVQGLQGPMPNAITTAAGFAVFQGVFFKL 182         |
|           |     | GIA VMKRIRGKED+ESAVVAA GSG AYSLSV GLQGPMPNAITTAAGFAVFQGVFFKL             |
| 30-2      | 118 | GIACVMKRIRGKEDLESAVVAAPFGSGVAYSLSVAGLQGPMPNAITTAAGFAVFQGVFFKL 177        |
| HP30      | 183 | GERFSKPSSTEDPFFTRGRTMLVKLGLEKYKNFKKGLLDPTLPLLTDSALKDANIPPGP 242          |
|           |     | GERFSKPS EDP++TRGR+ML+KLGLEKYKNFKKGLL DPTLPLLTDSAL+D +IPPGP              |
| 30-2      | 178 | GERFSKPSVEDPYTRGRSMLLKLGLEKYKNFKKGLLADPTLPLLTDSALRDVSIIPPGP 237          |
| HP20      | 243 | RLMILDHIQRDPEIKGKR 260                                                   |
|           |     | RL+ILDHIQRDPE+KGKR                                                       |
| 30-2      | 238 | RLILDHIQRDPEIKGKR 255                                                    |

**Fig. S1.** (A) Cyanogen bromide-derived (overlined) and endoproteinase Lys C-derived (underlined) peptides of CLP1 obtained in vitro and amino acid sequence alignment with HP20 (At4g26670) and HP22 (At5g55510). (B) As in A, but showing tryptic peptides (underlined) obtained for CLP2 (Fig. 1) and their alignments with HP30 (At3g49560) and HP30-2 (At5g24650).

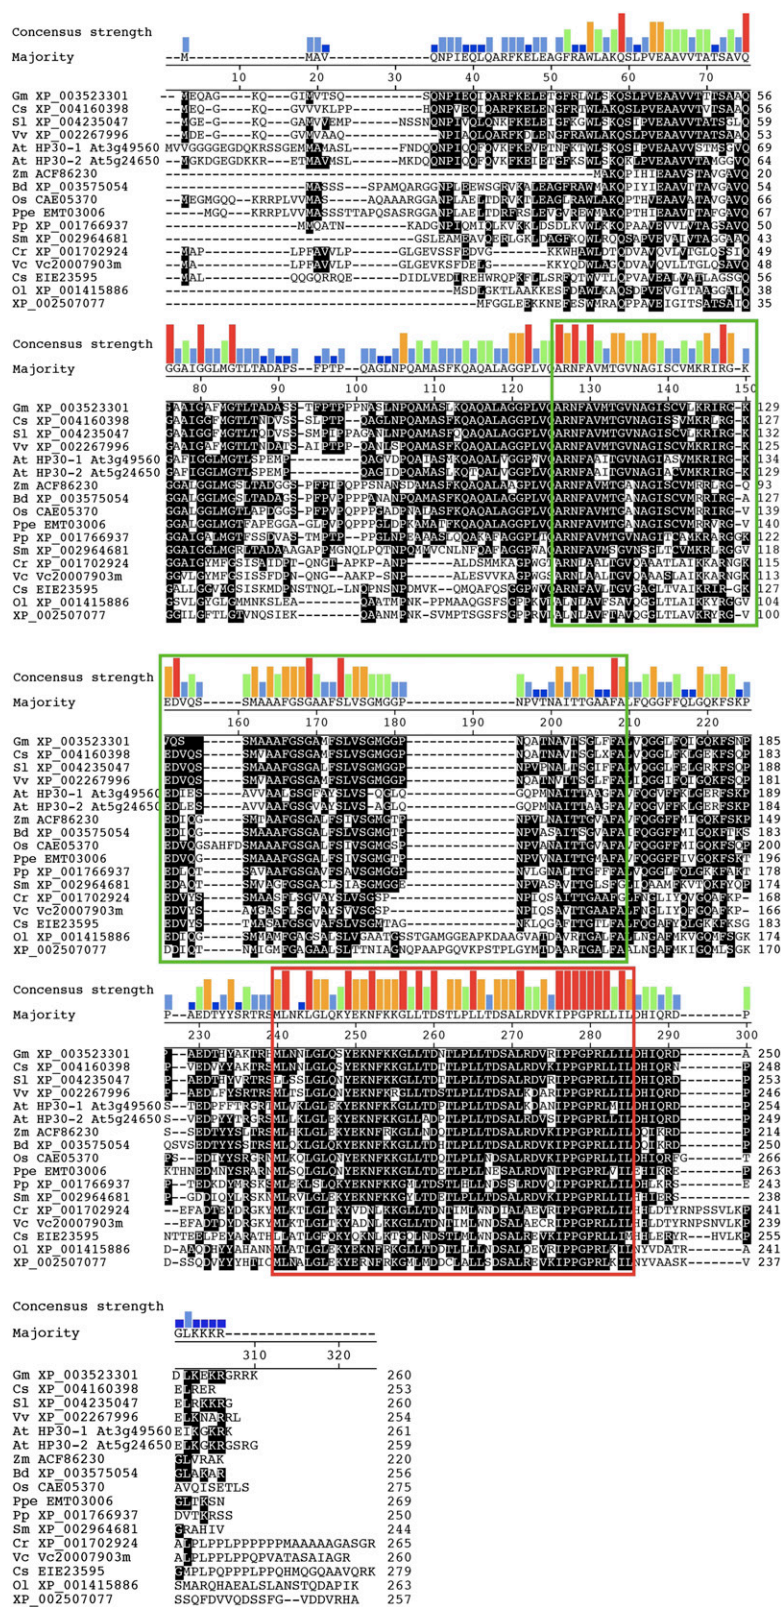

**Fig. S2.** Multiple sequence alignment of HP30-like proteins from 17 plant and algal species. The proteins listed in Table S3 were aligned using the CLUSTALW algorithm with default gap opening and extension penalties. The region defining the translocon of the inner mitochondrial membrane (TIM) domain is outlined by a green box. The predicted sterile alpha motif (SAM) domain unique to the HP30-like plant preprotein and amino acid transporter (PRAT) subfamily is outlined by the red box. The consensus motif in Fig. 2C is derived from the consensus sequence in this region (red bars).



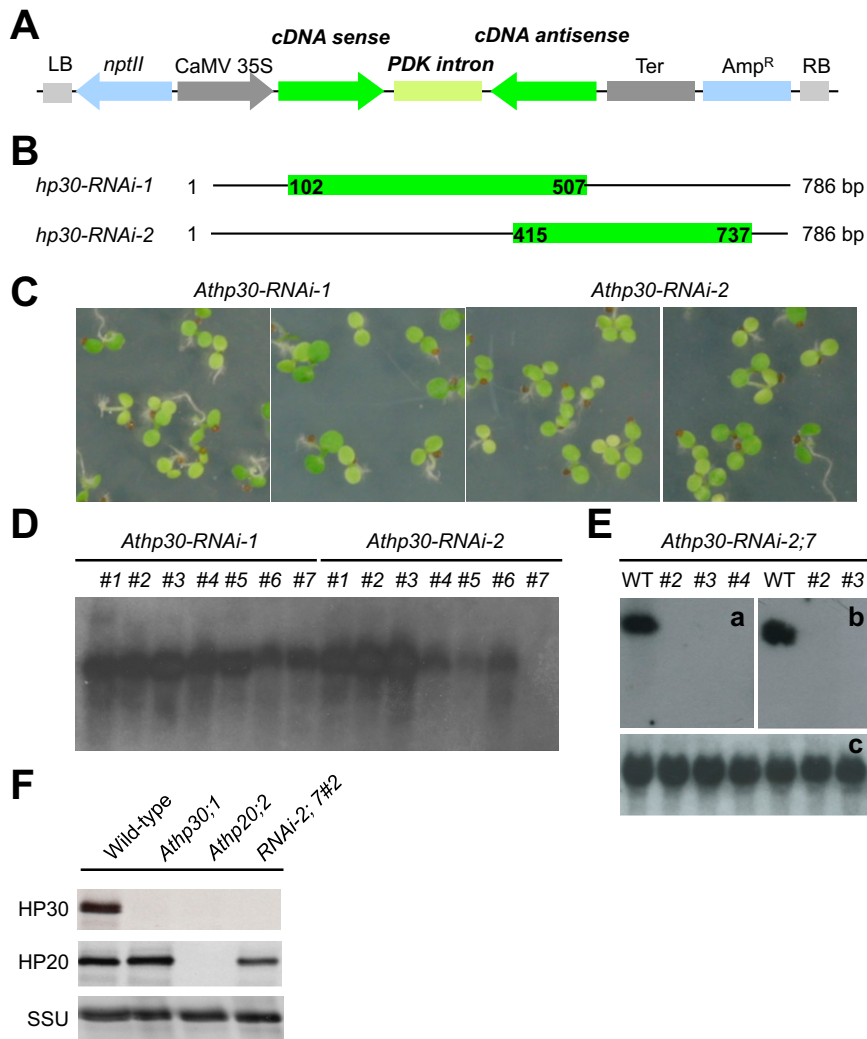

**Fig. 54.** Creation and characterization of *RNAi* plants lacking HP30 and HP20-2. (A) *RNAi* constructs in the binary vector pArt27 containing the *RNAi* inducing-relevant components between left (LB) and right border (RB). (B) Presentation of the mRNA sequences of *HP20* and *HP30* (green parts) that were selected, in sense direction.  $Amp^R$ , ampicillin resistance gene for bacterial selection; CaMV 35S, 35S cauliflower mosaic virus promoter; *nptII*, kanamycin resistance gene (plant selection marker); PDK, pyruvate orthophosphate dikinase; Ter, Terminator. (C) Phenotypes of *Athp30-RNAi-1* and *Athp30-RNAi-2* seedlings after growth for 5 d in 16 h light/8 h dark cycles at  $60 \mu E m^{-2} s^{-1}$ . (D) Northern blot analysis of HP30 transcripts in the offspring of the different *Athp30-RNAi-1* and *Athp30-RNAi-2* plants. (E) As in D, but showing HP30 (a) and HP30-2 (b) transcript levels in the final mutant plants determined with gene-specific probes (Table S1). For comparison, a replicate blot was probed with an HP20-specific probe (c). (F) Western blot analysis to confirm the absence of expression of HP30 in the final *RNAi-2;7#2* and *RNAi-2;7#3* plants.

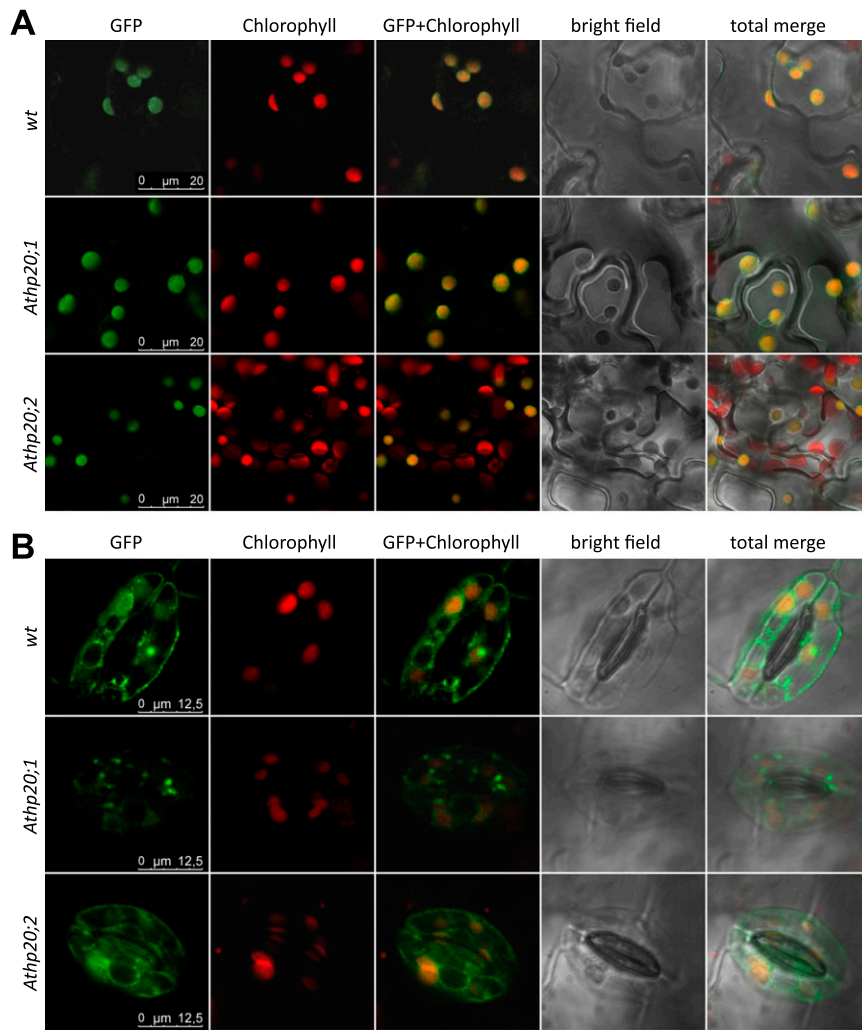

**Fig. 55.** *In planta* import of ceQORH-GFP in mesophyll cells (A) and guard cells (B) of plants of the T<sub>2</sub> generation of stably transformed *Arabidopsis thaliana* WT and mutants *Athp20;1* and *Athp20;2*. Fluorescence signals of GFP (green) and chlorophyll (red) were collected simultaneously by confocal laser scanning microscopy. In addition, bright-field images are shown before and after merging the fluorescence signals. Size markers are indicated (bars).



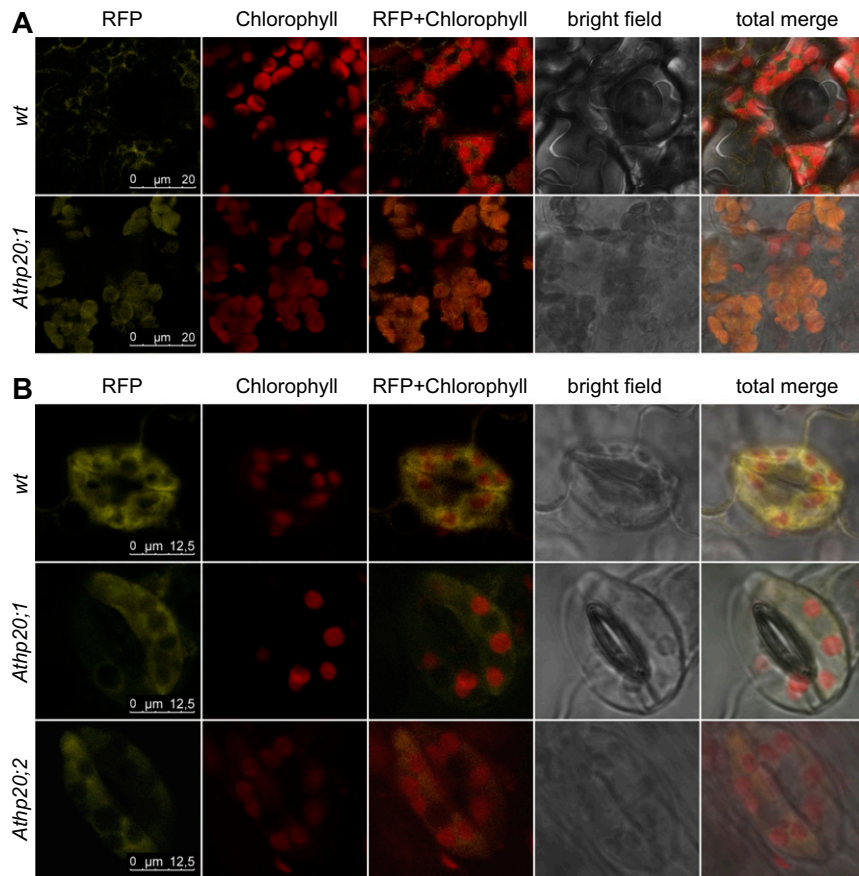

**Fig. S8.** *In planta* import of TIC32-RFP in mesophyll cells (A) and guard cells (B) of plants of the T<sub>2</sub> generation of stably transformed *A. thaliana* WT and *Athp20;1* and *Athp20;2* mutants. Fluorescence signals of RFP (yellow) and chlorophyll (red) were collected simultaneously by confocal laser scanning microscopy.



**Table S1. List of sequence sources used in Fig. 2**

| Protein Name      | Species                                 | Gene ID or gene model* | GenBank protein ID | TIM domain region |
|-------------------|-----------------------------------------|------------------------|--------------------|-------------------|
| Cr HP30-like      | <i>Chlamydomonas reinhardtii</i>        | Cre03.g183100.t1*      | XP_001702924       | 91–150            |
| Vc HP30-like      | <i>Volvox carteri f. nagariensis</i>    | Vocar20007903m*        | XP_002946728       | 89–144            |
| OI HP30-like      | <i>Ostreococcus lucimarinus</i> CCE9901 | Chr_1:642,207–643,165  | XP_001415886       | 80–135            |
| At HP30-1         | <i>Arabidopsis thaliana</i>             | At3g49560              | ABD64055           | 111–166           |
| At HP30-2         | <i>Arabidopsis thaliana</i>             | At5g24650              | ABD64056           | 106–161           |
| At HP20           | <i>Arabidopsis thaliana</i>             | At4g26670              | ABD64059           | 88–142            |
| At HP22           | <i>Arabidopsis thaliana</i>             | At5g55510              | ABD64060           | 88–142            |
| Cr HP20/22-like   | <i>Chlamydomonas reinhardtii</i>        | Cre01.g050400.t2.1*    | XP_001689761       | 103–157           |
| Vc HP20/22-like   | <i>Volvox carteri f. nagariensis</i>    | Vocar20009762m*        | None               | 97–151            |
| At TIM17-1        | <i>Arabidopsis thaliana</i>             | At1g20350              | AAO63303           | 63–117            |
| At TIM17-2        | <i>Arabidopsis thaliana</i>             | At2g37410              | NP_973621          | 63–117            |
| At TIM17-3        | <i>Arabidopsis thaliana</i>             | At5g11690              | NP_196730          | 63–117            |
| OI TIM17-like     | <i>Ostreococcus lucimarinus</i> CCE9901 | Chr_1:280,962–281,369  | XP_001415788       | 63–117            |
| Cr TIM17-like     | <i>Chlamydomonas reinhardtii</i>        | Cre10.g452650.t1.2*    | XP_001698342       | 72–126            |
| Vc TIM17-like     | <i>Volvox carteri f. nagariensis</i>    | Vocar20010628m*        | XP_002957341       | 71–126            |
| ScTIM17           | <i>Saccharomyces cerevisiae</i>         | YJL143W                | AA556178           | 62–116            |
| At OEP16-3        | <i>Arabidopsis thaliana</i>             | At2g42210              | ABD48955           | 66–122            |
| OI TIM22-like1    | <i>Ostreococcus lucimarinus</i> CCE9901 | Chr_1:823,163–823,642  | XP_001415610       | 65–120            |
| At3g25120         | <i>Arabidopsis thaliana</i>             | At3g25120              | NP_566759          | 65–122            |
| Sc TIM22          | <i>Saccharomyces cerevisiae</i>         | YDL217C                | AA556497           | 126–180           |
| Cr TIM22-like     | <i>Chlamydomonas reinhardtii</i>        | XP_001689511           | XP_001689511       | 121–175           |
| Vc TIM22-like     | <i>Volvox carteri f. nagariensis</i>    | Vocar20010161m*        | XP_002952140       | 122–176           |
| OI TIM22-like     | <i>Ostreococcus lucimarinus</i> CCE9901 | Chr_5:355,576–356,178  | XP_001417996       | 130–184           |
| At TIM22-1        | <i>Arabidopsis thaliana</i>             | At1g18320              | ABD64057           | 102–156           |
| At TIM22-2        | <i>Arabidopsis thaliana</i>             | At3g10110              | ABD64057           | 102–156           |
| At OEP16-1        | <i>Arabidopsis thaliana</i>             | At2g28900              | ABD48954           | 74–130            |
| At OEP16-2        | <i>Arabidopsis thaliana</i>             | At4g16160              | NP_849394          | 103–158           |
| Ps OEP16          | <i>Pisum sativum</i>                    | none                   | Q41050             | 74–128            |
| At OEP16-4        | <i>Arabidopsis thaliana</i>             | At3g26880              | NP_001030919       | 60–114            |
| At TIM23-1        | <i>Arabidopsis thaliana</i>             | At1g17530              | NP_564028          | 111–165           |
| At TIM23-2        | <i>Arabidopsis thaliana</i>             | At1g72750              | NP_177419          | 112–166           |
| At TIM23-3        | <i>Arabidopsis thaliana</i>             | At3g04800              | ABF83637           | 111–166           |
| Sc TIM23          | <i>Saccharomyces cerevisiae</i>         | YNR017W                | CAA96296           | 149–203           |
| Cr g14885.t       | <i>Chlamydomonas reinhardtii</i>        | g14885.t1*             | XP_001689829       | 101–156           |
| Vc Vocar20008538m | <i>Volvox carteri f. nagariensis</i>    | Vocar20008538m*        | XP_002946650       | 101–156           |

\*Gene model identification numbers refer to [www.phytozome.net](http://www.phytozome.net).

**Table S2. List of sequence sources used in Fig. S2**

| Protein name     | Species                                    | Gene ID or gene model*  | GenBank protein ID |
|------------------|--------------------------------------------|-------------------------|--------------------|
| Cr HP30-like     | <i>Chlamydomonas reinhardtii</i>           | Cre03.g183100.t1*       | XP_001702924       |
| Vc HP30-like     | <i>Volvox carteri f. nagariensis</i>       | Vocar20007903m*         | XP_002946728       |
| OI HP30-like     | <i>Ostreococcus lucimarinus</i> CCE9901    | Chr_1:642,207.0.643,165 | XP_001415886       |
| At HP30-1        | <i>Arabidopsis thaliana</i>                | At3g49560               | ABD64055           |
| At HP30-2        | <i>Arabidopsis thaliana</i>                | At5g24650               | ABD64056           |
| Zm ACF86230      | <i>Zea mays</i>                            |                         | ACF86230           |
| Os CAE05370      | <i>Oryza sativa Japonica</i>               |                         | CAE05370           |
| Cs EIE23595      | <i>Coccomyxa subellipsoidea</i>            |                         | EIE23595           |
| Vv XP_002267996  | <i>Vitis vinifera</i>                      |                         | XP_002267996       |
| Msp XP_002507077 | <i>Micromonas sp. RCC299</i>               |                         | XP_002507077       |
| Sm XP_002964681  | <i>Selaginella moellendorffii</i>          |                         | XP_002964681       |
| Gm XP_003523301  | <i>Glycine max</i>                         |                         | XP_003523301       |
| Sl XP_004235047  | <i>Solanum lycopersicum</i>                |                         | XP_004235047       |
| Pp XP_001766937  | <i>Physcomitrella patens subsp. patens</i> |                         | XP_001766937       |
| Ppe EMT03006     | <i>Prunus persica</i>                      |                         | EMT03006           |
| Bd XP_003575054  | <i>Brachypodium distachyon</i>             |                         | XP_003575054       |
| Cs XP_004160398  | <i>Cucumis sativus</i>                     |                         | XP_004160398       |

\*Gene model identification numbers refer to [www.phytozome.net](http://www.phytozome.net).

Table S3. List of oligonucleotides and their application

| Notation           | Sequence (5'–3')                                  | Application                                                                                                                                                                                 |                                                                                                                                                                           |
|--------------------|---------------------------------------------------|---------------------------------------------------------------------------------------------------------------------------------------------------------------------------------------------|---------------------------------------------------------------------------------------------------------------------------------------------------------------------------|
| Prot HP20F1        | attB1 <sup>a</sup> + GCGGCGAACGATTCTTCA           | Cloning (without start codon) into pDEST17 for heterologous expression of N-terminally His-tagged proteins                                                                                  |                                                                                                                                                                           |
| Prot HP20R1        | attB2 <sup>b</sup> + <u>TTAGAACTTCCTTGGTTTAGC</u> |                                                                                                                                                                                             |                                                                                                                                                                           |
| Prot HP30F1        | attB1 + GTGGTAGGCGGCGGAGGAGAA                     |                                                                                                                                                                                             |                                                                                                                                                                           |
| Prot HP30R1        | attB2 + <u>CTACTTTCTGTTGCCCTTTATCTC</u>           |                                                                                                                                                                                             |                                                                                                                                                                           |
| At5g5551-FW1       | attB1 + GCGGCCGAGAATTCTCAAAC                      |                                                                                                                                                                                             |                                                                                                                                                                           |
| At5g5551-RW1       | attB2 + <u>TCAACGAGCATGAGGAAATTT</u>              |                                                                                                                                                                                             |                                                                                                                                                                           |
| At5g24650-FW1      | attB1 + GGGAAAGACGGAGAAGGAGAC                     |                                                                                                                                                                                             |                                                                                                                                                                           |
| At5g24650-RW1      | attB2 + <u>TCAACCACGACTTCCCCGCTT</u>              |                                                                                                                                                                                             |                                                                                                                                                                           |
| Hp20GFPP1          | attB1 + <u>ATGGCGGCGAACGATTCTTCA</u>              |                                                                                                                                                                                             | Cloning (without stop codon) into pK7FWG2 or pB7RWG2 for in vivo localization via C-terminally tagged GFP/RFP                                                             |
| Hp20GFPR1          | attB2 + AAGCTTCCTTGGTTAGCTAA                      |                                                                                                                                                                                             |                                                                                                                                                                           |
| Hp30GFPP1          | attB1 + <u>ATGGTGGTAGGCGGCGGAGGAGAA</u>           |                                                                                                                                                                                             |                                                                                                                                                                           |
| Hp30GFPR1          | attB2 + CTTTCTGTTGCCCTTTATCTC                     |                                                                                                                                                                                             |                                                                                                                                                                           |
| Tic32RFPF1         | attB1 + <u>ATGTGGTTTTTTGGATCG</u>                 |                                                                                                                                                                                             |                                                                                                                                                                           |
| Tic32RFPR1         | attB2 + AGAACTGCTTCTCCTGA                         |                                                                                                                                                                                             |                                                                                                                                                                           |
| ceqorhFWatt        | attB1 + <u>ATGGCTGGAAAACATGCACGCTC</u>            |                                                                                                                                                                                             |                                                                                                                                                                           |
| ceqorhRWatt        | attB2 + TGGCTCGACAATGATCTTCCAGTA                  |                                                                                                                                                                                             |                                                                                                                                                                           |
| FdGFP              | attB1 + <u>ATGGCTTCTACACTCTACC</u>                | Genotyping of <i>A. thaliana</i> T-DNA insertion lines                                                                                                                                      |                                                                                                                                                                           |
| FdGFPR1            | attB2 + AGCAGTAAGTTCCTCCTCCTT                     |                                                                                                                                                                                             |                                                                                                                                                                           |
| LBa1               | TGGTTCACGTAGTGGGCCATCG                            |                                                                                                                                                                                             |                                                                                                                                                                           |
| HP20PF             | CTATTGACATCGACGGGAAT                              |                                                                                                                                                                                             |                                                                                                                                                                           |
| HP20PR             | TGCAAATGATCCTTTGAAGC                              |                                                                                                                                                                                             |                                                                                                                                                                           |
| HP30GT1            | AAGCGGATTAGAGGCAAAGAG                             |                                                                                                                                                                                             |                                                                                                                                                                           |
| HP30GT2            | GATTGGCCAATTGTATGAACC                             |                                                                                                                                                                                             |                                                                                                                                                                           |
| KanF2              | CTATGACTGGGCACAACAGAC                             |                                                                                                                                                                                             |                                                                                                                                                                           |
| KanR2              | GAAGGCGATAGAAGGCGATG                              |                                                                                                                                                                                             |                                                                                                                                                                           |
| LB GT1             | ACTTAATAACACATTGCGGACG                            |                                                                                                                                                                                             | Production of digoxigenin-labeled probes for specific DNA or RNA detection on southern and Northern blots                                                                 |
| LB GT2             | CTTAATCGCCTTGACAGCATC                             |                                                                                                                                                                                             |                                                                                                                                                                           |
| hp20-F1            | GTGACGAAGCGACCGATAATG                             |                                                                                                                                                                                             |                                                                                                                                                                           |
| hp20-R1            | ATTTCTCAGGGATCGGGAGAG                             |                                                                                                                                                                                             |                                                                                                                                                                           |
| hp30-F1            | GCGATGGCGAGTTTATTCAACG                            |                                                                                                                                                                                             |                                                                                                                                                                           |
| hp30-R1            | CCTTTATCTCCGGGTCCTCT                              |                                                                                                                                                                                             |                                                                                                                                                                           |
| POR-fwd            | attB1 + <u>ATGGCCCTTCAAGCTGCTTCT</u>              | Detection of transcripts by RT-PCR and subsequent cloning                                                                                                                                   |                                                                                                                                                                           |
| POR-rev            | attB2 + <u>TTTAGGCCAAGCCTACGAGC</u>               |                                                                                                                                                                                             |                                                                                                                                                                           |
| PORA-utr-fwd       | attB1 + TAACATTACATTACACT                         |                                                                                                                                                                                             |                                                                                                                                                                           |
| PORA-utr-rev       | attB2 + TGTTTCGTTAAGACTTAAA                       |                                                                                                                                                                                             |                                                                                                                                                                           |
| FLU-fwd            | attB1 + <u>ATGTGGCAGGGAATTGGGAGG</u>              |                                                                                                                                                                                             |                                                                                                                                                                           |
| FLU-rev            | attB2 + <u>TCAGTCAGTCTCTAACCGAGC</u>              |                                                                                                                                                                                             |                                                                                                                                                                           |
| HP20RNAiF3         | <u>GACGGATCCCTCGAG</u> TAATGATTCTCGAAGGCATT       |                                                                                                                                                                                             | Production of RNAi constructs in pHannibal (forward primers with <i>Bam</i> HI and <i>Xho</i> I; reverse primers with <i>Kpn</i> I and <i>Hind</i> III restriction sites) |
| HP20RNAiF4         | <u>GACGGATCCCTCGAG</u> TGCCTTCTGAAGCAAATCCGA      |                                                                                                                                                                                             |                                                                                                                                                                           |
| HP20RNAiR3         | CTG <u>AAGCTTGGTACC</u> AAACGTGAGACAACTCTGTAG     |                                                                                                                                                                                             |                                                                                                                                                                           |
| HP20RNAiR4         | CTG <u>AAGCTTGGTACC</u> TTTGATTTCTCAGGGATCGG      |                                                                                                                                                                                             |                                                                                                                                                                           |
| HP30RNAiF3         | <u>GACGGATCCCTCGAG</u> GTTTCAGGTTAAATCAAAGA       |                                                                                                                                                                                             |                                                                                                                                                                           |
| HP30RNAiF4         | <u>GACGGATCCCTCGAG</u> TCTGCAGTGGTGGCAGCGTTA      |                                                                                                                                                                                             |                                                                                                                                                                           |
| HP30RNAiR3         | CTG <u>AAGCTTGGTACC</u> AGCAGTAGTGATTGCATTAT      |                                                                                                                                                                                             |                                                                                                                                                                           |
| HP30RNAiR4         | CTG <u>AAGCTTGGTACC</u> ATCATAAGTCTTGGCCCTGGT     |                                                                                                                                                                                             |                                                                                                                                                                           |
| RNAiPDKF1          | TGACAAAGTGATGTGAAGACG                             |                                                                                                                                                                                             |                                                                                                                                                                           |
| RNAiPDKR1          | AATGATAGATCTTGCGCTTTG                             | Identification of transformed <i>A. thaliana</i> plants by amplification of the PDK intron in RNAi lines, the <i>gfp/rfp</i> sequences and the connection between cDNA and fluorescence tag |                                                                                                                                                                           |
| FdGFPP2            | TCTCGTGGCAGAGTGACTGC                              |                                                                                                                                                                                             |                                                                                                                                                                           |
| HP20GFPP2          | CTCAGGCTCTTGTGGGTGGT                              |                                                                                                                                                                                             |                                                                                                                                                                           |
| HP30GFPP2          | AGATGCAGGGCAGTCTGCTAA                             |                                                                                                                                                                                             |                                                                                                                                                                           |
| Tic32RFPF2         | CGGTTCTCGTATCCAGAAGGAGT                           |                                                                                                                                                                                             |                                                                                                                                                                           |
| QORGFPF2           | AACCGCTCTCCAAGCTCTTAC                             |                                                                                                                                                                                             |                                                                                                                                                                           |
| egfp1              | ATGGTGAGCAAGGGCGAG                                |                                                                                                                                                                                             |                                                                                                                                                                           |
| egfp2              | GGTGCCTCCTGGACGTA                                 |                                                                                                                                                                                             |                                                                                                                                                                           |
| rfp1               | CGACTACTGAAGCTGTCCT                               |                                                                                                                                                                                             |                                                                                                                                                                           |
| rfp2               | CTCGTACTGTTCCACGATG                               |                                                                                                                                                                                             |                                                                                                                                                                           |
| rfp3               | AAGTTCATCACGCGCTCCCACT                            |                                                                                                                                                                                             |                                                                                                                                                                           |
| <sup>a</sup> attB1 | GGGGACAAGTTTTGTACAAAAAGCAGGCTCC                   |                                                                                                                                                                                             |                                                                                                                                                                           |
| <sup>b</sup> attB2 | GGGGACCACTTTGTACAAGAAAGCTGGGTC                    |                                                                                                                                                                                             |                                                                                                                                                                           |

Restriction sites are highlighted in color. Start and stop codons are underlined. Synthesis was carried out by Sigma-Genosys, MWG Biotech AG, and Invitrogen.
